# Supplementary material for: Semi-Continuous Subcritical Water Extraction of Flavonoids from Citrus unshiu Peel: Their Antioxidant and Enzyme Inhibitory Activities
Source: PubMed Central journal article supplement (PMC7278842; doi:10.3390/antiox9050360), 2020-04-25
Supplement: antioxidants-09-00360-s001.pdf [file antioxidants-09-00360-s001.pdf]

## Supplementary materials

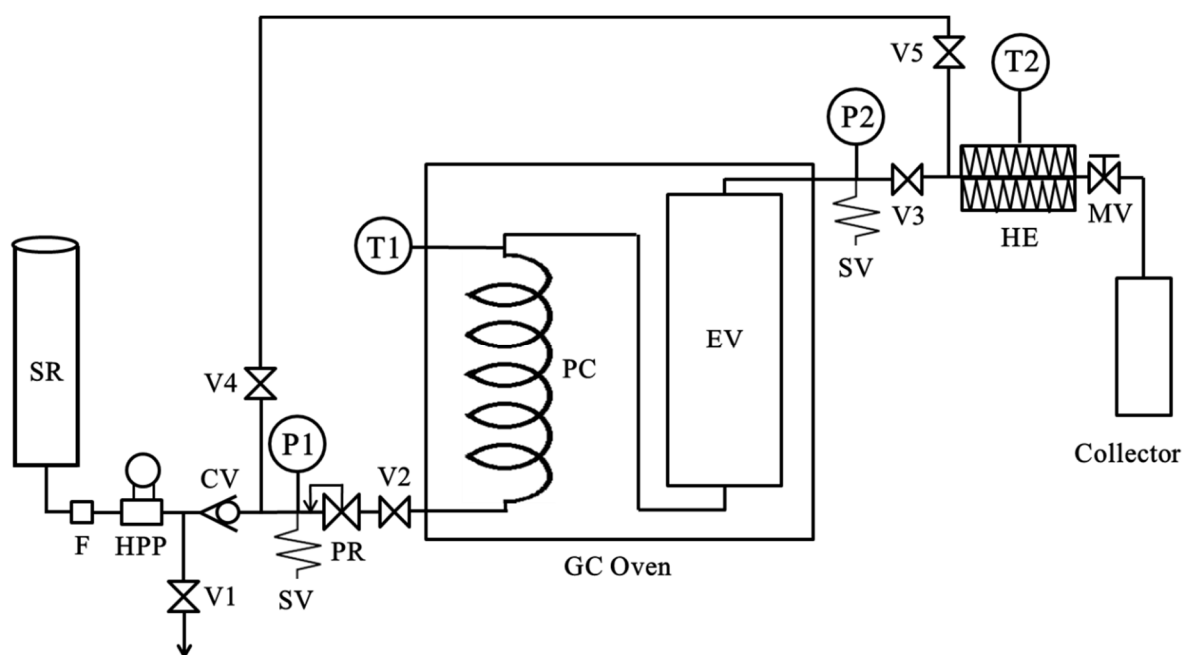

**Figure S1.** Schematic diagram of the dynamic subcritical water extraction apparatus (CV, check valve; EV, extraction vessel; F, in-line filter; FM, flow meter; HE, heat exchanger; HPP, high pressure pump; MV, metering valve; P, pressure gauge; PC, preheating coil; PR, pressure regulator; SV, safety valve; SR, solvent reservoir; T, temperature indicator; V, on/off valve).

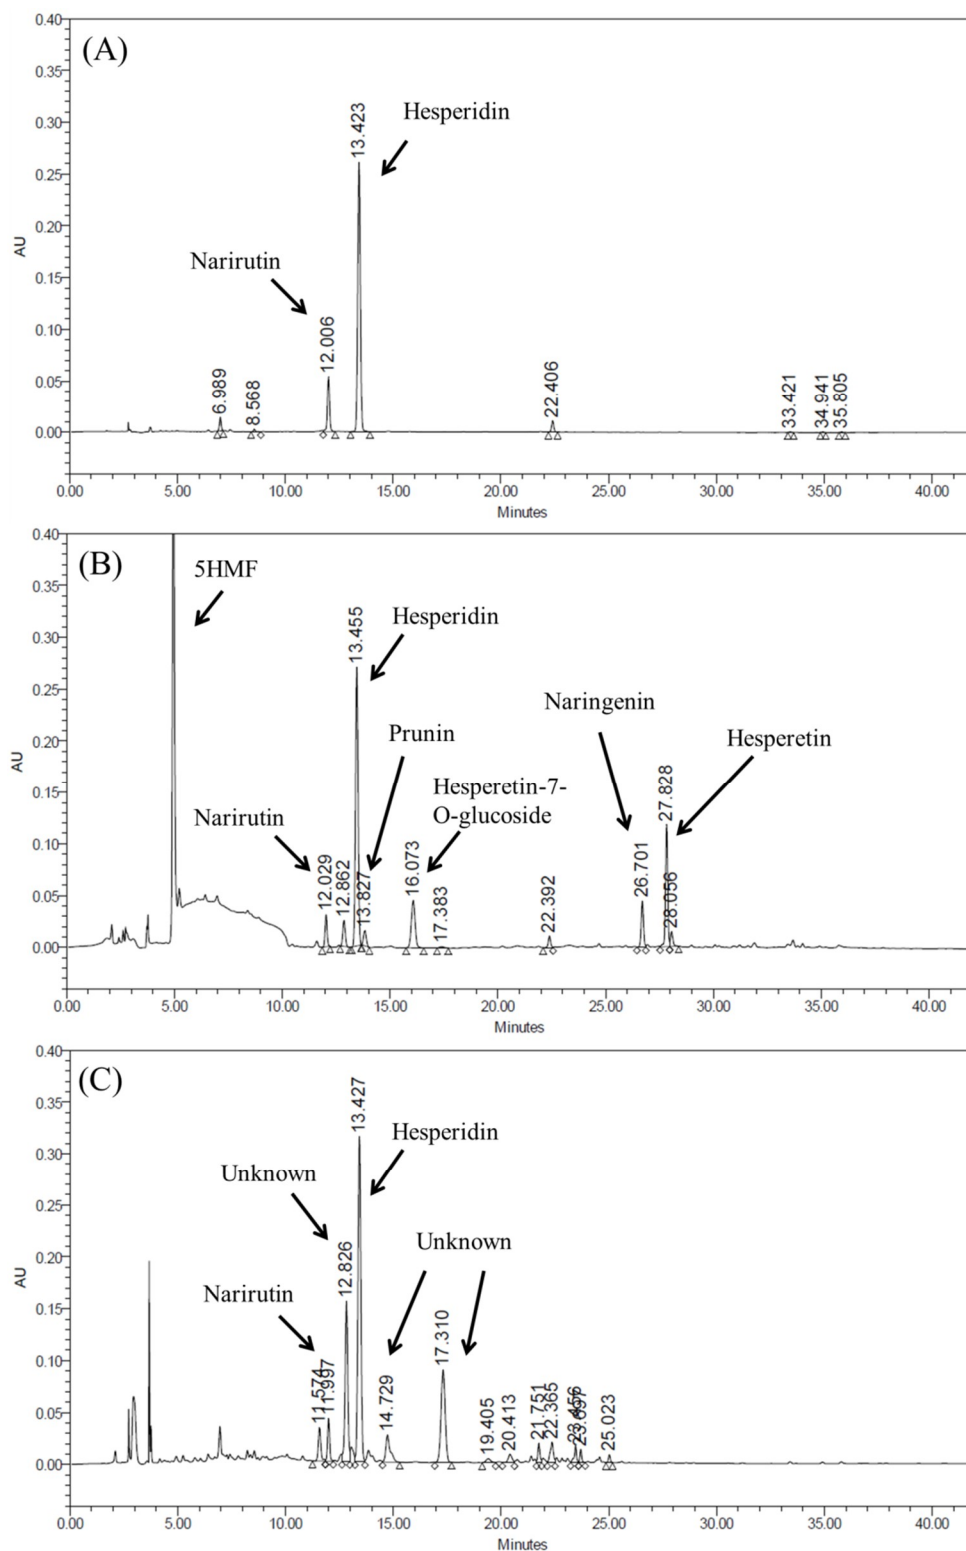

**Figure S2.** High-performance liquid chromatography chromatograms of the (a) methanol extract, (b) acid hydrolysate, and (c) base hydrolysate of *Citrus unshiu* peel.

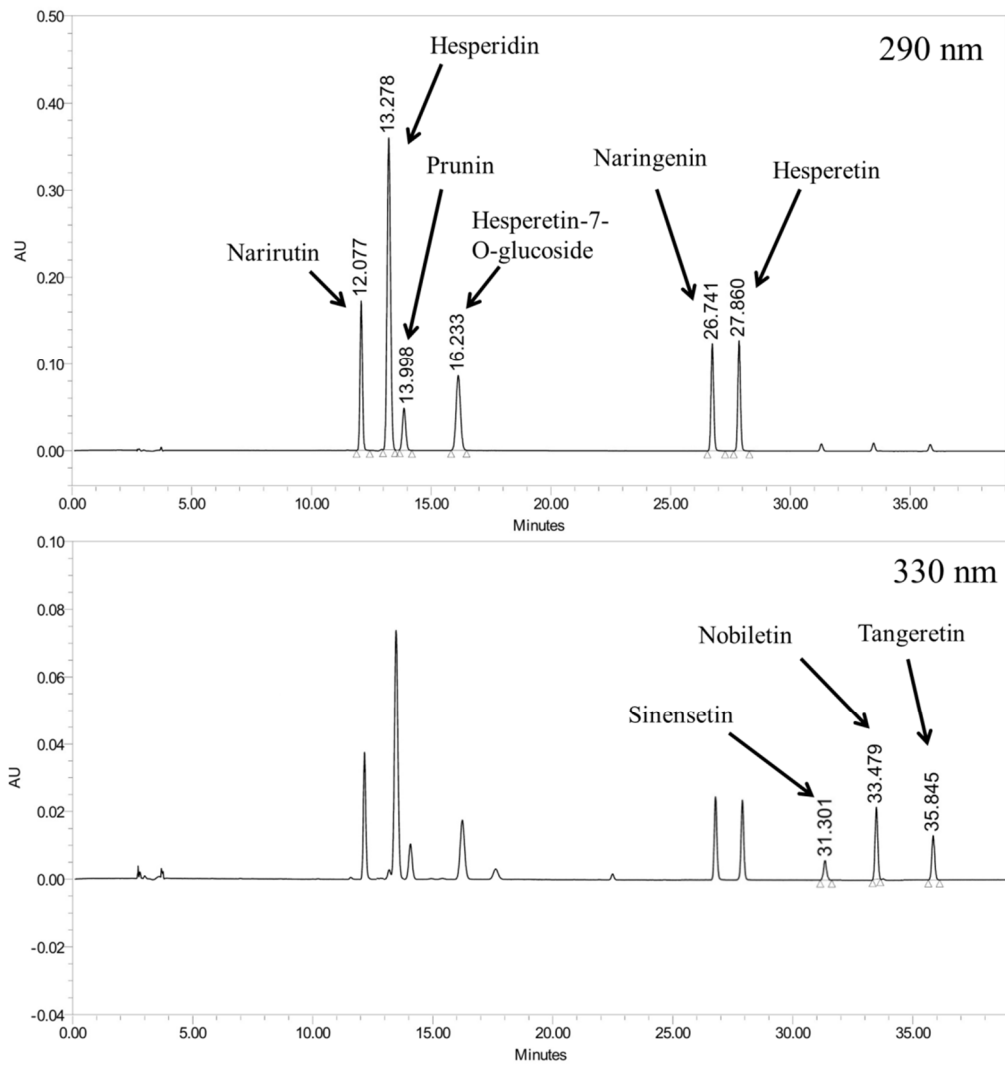

**Figure S3.** High-performance liquid chromatography chromatograms of flavonoid standards.

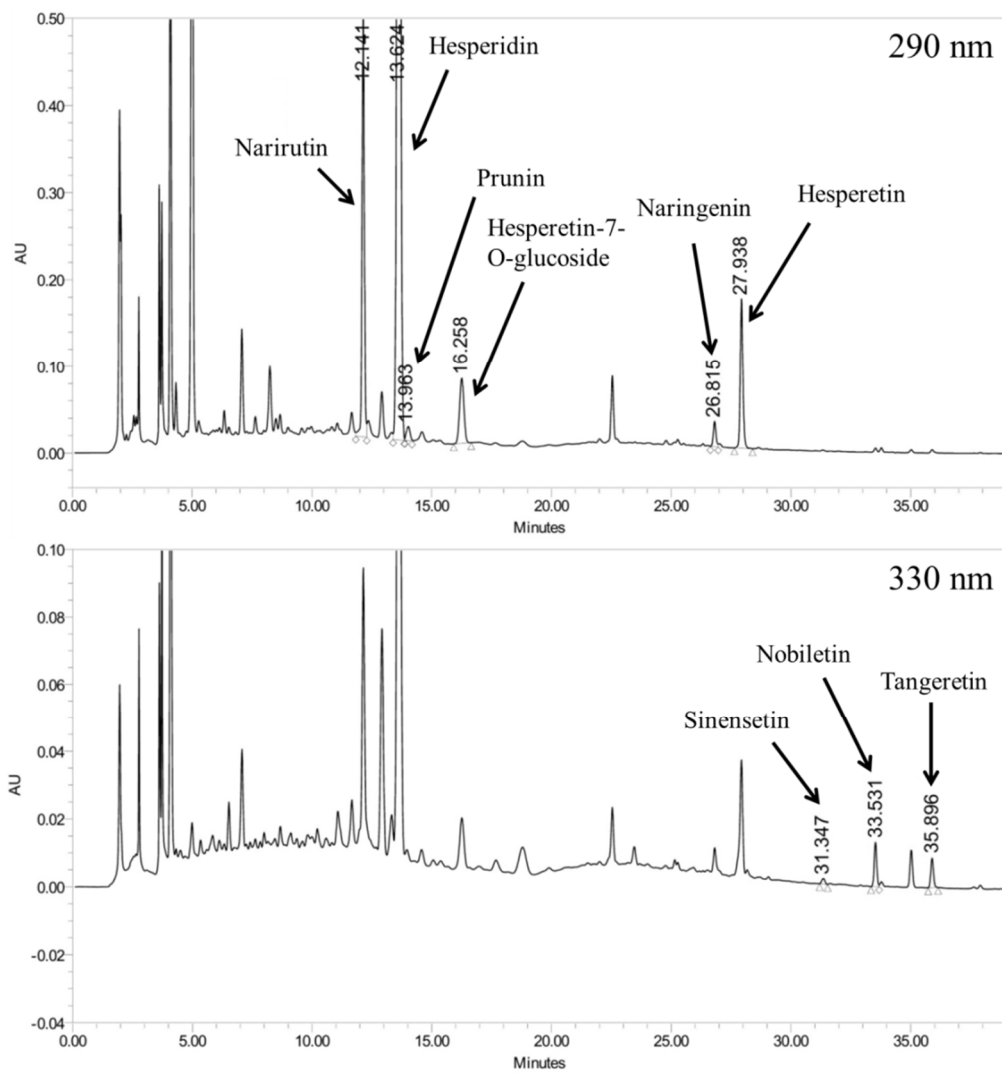

**Figure S4.** High-performance liquid chromatography chromatograms of the subcritical water extract at 175 °C and 1.5 mL/min.

**Table S1.** The regression equation for each standard compound analyzed.

| Compound                 | Linear range (mg/L) | Calibration curve      | R <sup>2</sup> |
|--------------------------|---------------------|------------------------|----------------|
| Hesperidin               | 25–200              | $y = 18.063x + 6.25$   | 0.9996         |
| Hesperetin-7-O-glucoside | 6–50                | $y = 21.997x - 0.1071$ | 0.9999         |
| Hesperetin               | 5–25                | $y = 38.8x - 3$        | 0.9999         |
| Narirutin                | 10–80               | $y = 16.423x - 0.1429$ | 0.9994         |
| Prunin                   | 2.5–20              | $y = 23.938x + 0.0714$ | 0.9998         |
| Naringenin               | 5–25                | $y = 38.34x - 2.1$     | 0.9999         |
| Sinensetin               | 0.2–1               | $y = 42.5x - 0.7$      | 0.9996         |
| Nobiletin                | 0.5–5               | $y = 41.762x + 0.0357$ | 0.9998         |
| Tangeretin               | 0.25–2.25           | $y = 54.381x + 0.0714$ | 0.9997         |

**Table S2.** Symbols and levels of the independent variables.

|                    | Symbol         | Factor level |     |     |     |      |
|--------------------|----------------|--------------|-----|-----|-----|------|
|                    |                | -1.5         | -1  | 0   | +1  | +1.5 |
| Temperature (°C)   | X <sub>1</sub> | 145          | 150 | 160 | 170 | 175  |
| Flow rate (mL/min) | X <sub>2</sub> | 0.75         | 1   | 1.5 | 2   | 2.25 |

**Table S3.** Composition of flavonoids in *Citrus unshiu* peel.

|            | Flavonoid content<br>( $\mu\text{g/g dry sample}$ ) (%) |      |
|------------|---------------------------------------------------------|------|
| Hesperidin | 50,027.4 $\pm$ 970.8                                    | 84.1 |
| Narirutin  | 9284.4 $\pm$ 241.1                                      | 15.6 |
| Sinensetin | 18.9 $\pm$ 0.2                                          | 0.03 |
| Nobiletin  | 103.8 $\pm$ 0.5                                         | 0.18 |
| Tangeretin | 55.5 $\pm$ 0.3                                          | 0.09 |
| Total      | 59,490.0 $\pm$ 1211.5                                   | 100  |

Data are expressed as the mean  $\pm$  standard deviation of triplicate experiments.

**Table S4.** Results of analysis of variance for regression models.

| Source                        | Hesperidin |                    | Narirutin |                    | Sinensetin |                    | Nobiletin |                    | Tangeretin |                    |
|-------------------------------|------------|--------------------|-----------|--------------------|------------|--------------------|-----------|--------------------|------------|--------------------|
|                               | F-value    | p-value (Prob > F) | F-value   | p-value (Prob > F) | F-value    | p-value (Prob > F) | F-value   | p-value (Prob > F) | F-value    | p-value (Prob > F) |
| Model                         | 245.79     | < 0.0001           | 476.95    | < 0.0001           | 33.03      | 0.0008             | 41.40     | 0.0005             | 28.62      | 0.0011             |
| X <sub>1</sub>                | 137.85     | < 0.0001           | 0.03      | 0.8708             | 12.67      | 0.0162             | 14.87     | 0.0119             | 6.36       | 0.0531             |
| X <sub>2</sub>                | 986.57     | < 0.0001           | 2376.63   | < 0.0001           | 133.22     | < 0.0001           | 178.96    | < 0.0001           | 132.15     | < 0.0001           |
| X <sub>1</sub> <sup>2</sup>   | 103.29     | 0.0002             | 5.37      | 0.0682             | 6.31       | 0.0537             | 3.87      | 0.1064             | 2.98       | 0.1447             |
| X <sub>2</sub> <sup>2</sup>   | 18.35      | 0.0078             | 0.02      | 0.9010             | 12.59      | 0.0164             | 12.05     | 0.0178             | 0.00       | 0.9814             |
| X <sub>1</sub> X <sub>2</sub> | 0.44       | 0.5348             | 1.76      | 0.2425             | 4.74       | 0.0814             | 0.39      | 0.5600             | 1.17       | 0.3284             |
| Lack of fit                   | 3.56       | 0.2270             | 3.40      | 0.2355             | 1.92       | 0.3602             | 11.20     | 0.0831             | 13.71      | 0.0688             |
| R <sup>2</sup>                | 0.9959     |                    | 0.9979    |                    | 0.9706     |                    | 0.9764    |                    | 0.9662     |                    |
| pred R <sup>2</sup>           | 0.9742     |                    | 0.9867    |                    | 0.8267     |                    | 0.8371    |                    | 0.7641     |                    |
| adj R <sup>2</sup>            | 0.9919     |                    | 0.9958    |                    | 0.9412     |                    | 0.9528    |                    | 0.9325     |                    |
| C.V%                          | 1.78       |                    | 1.13      |                    | 3.33       |                    | 2.36      |                    | 5.02       |                    |
| Adeq precision                | 44.8       |                    | 67.9      |                    | 17.5       |                    | 18.64     |                    | 16.1       |                    |

X<sub>1</sub>: temperature (°C), X<sub>2</sub>: flow rate (mL/min), pred R<sup>2</sup>: predicted R<sup>2</sup>, adj R<sup>2</sup>: adjusted R<sup>2</sup>, C.V: coefficient of variance, Adeq precision: adequate precision.

**Table S5.** Optimal subcritical water extraction parameters for maximizing flavonoid yields from *C. unshiu* peel.

|                | Temperature<br>(°C) | Flow rate<br>(mL/min) | Predicted yield                     |                                  | Desirability |
|----------------|---------------------|-----------------------|-------------------------------------|----------------------------------|--------------|
|                |                     |                       | µg/g dry sample                     | %                                |              |
| Hesperidin (H) | 164.4               | 2.25                  | 45,211.0                            | 90.4                             | 1            |
| Narirutin (N)  | 154.6               | 2.25                  | 8765.2                              | 94.4                             | 1            |
| Sinensetin (S) | 145.3               | 2.25                  | 18.7                                | 98.9                             | 1            |
| Nobiletin (NO) | 165.6               | 2.25                  | 91.2                                | 87.8                             | 1            |
| Tangeretin (T) | 160.5               | 2.25                  | 53.6                                | 96.6                             | 1            |
| H+N            | 159.5               | 2.25                  | 44,622.4/8,749.7                    | 89.1/ 94.2                       | 1            |
| S+NO+T         | 153.5               | 2.25                  | 18.4/89.0/52.9                      | 97.3/85.7<br>/95.3               | 0.8603       |
| H+N+S+NO+T     | 158.5               | 2.25                  | 44,366.4/8,755.4<br>/17.8/90.4/53.5 | 88.7/94.3<br>/94.2/87.1<br>/96.4 | 0.6389       |

**Table S6.** Pearson correlation coefficients representing associations between flavonoid yields and biological activities.

|                            | Antioxidant activity             |         |         | Enzyme inhibition activity |         |                       |                   |
|----------------------------|----------------------------------|---------|---------|----------------------------|---------|-----------------------|-------------------|
|                            | DPPH radical scavenging activity | FRAP    | ORAC    | Xanthine oxidase           | ACE     | $\alpha$ -Glucosidase | Pancreatic lipase |
| Sum of all flavonoids      | 0.911**                          | 0.798** | 0.841** | 0.615*                     | 0.698*  | 0.647                 | 0.676*            |
| Sum of hydrolysis products | 0.567                            | 0.719*  | 0.629   | 0.826**                    | 0.798** | 0.830**               | 0.795*            |
| Hesperidin (HPD)           | 0.857**                          | 0.725*  | 0.782*  | 0.513                      | 0.602   | 0.549                 | 0.585             |
| H7G (HPG)                  | 0.505                            | 0.651   | 0.576   | 0.796*                     | 0.761*  | 0.793*                | 0.753*            |
| Hesperetin (HPT)           | 0.629                            | 0.786*  | 0.666   | 0.848**                    | 0.831** | 0.860**               | 0.830**           |
| HPD+HPG+HPT                | 0.932**                          | 0.822** | 0.859** | 0.639                      | 0.719*  | 0.673*                | 0.702*            |
| HPG+HPT                    | 0.569                            | 0.721   | 0.624   | 0.827**                    | 0.801** | 0.831**               | 0.796*            |
| Narirutin (NRT)            | 0.685*                           | 0.479   | 0.560   | 0.293                      | 0.393   | 0.314                 | 0.344             |
| Prunin (PRN)               | 0.419                            | 0.562   | 0.562   | 0.736*                     | 0.666*  | 0.708*                | 0.695*            |
| Naringenin (NGN)           | 0.664                            | 0.812** | 0.718*  | 0.845**                    | 0.847** | 0.887**               | 0.821**           |
| NRT+PRN+NGN                | 0.786*                           | 0.601   | 0.676*  | 0.432                      | 0.526   | 0.453                 | 0.477             |
| PRN+NGN                    | 0.543                            | 0.692*  | 0.650   | 0.808**                    | 0.768*  | 0.809**               | 0.773*            |
| Sinensetin                 | 0.459                            | 0.269   | 0.292   | 0.047                      | 0.139   | 0.029                 | 0.102             |
| Nobiletin                  | 0.812**                          | 0.696*  | 0.689*  | 0.518                      | 0.591   | 0.520                 | 0.571             |
| Tangeretin                 | 0.787*                           | 0.625   | 0.690*  | 0.411                      | 0.522   | 0.466                 | 0.485             |
| Total PMFs                 | 0.782*                           | 0.634   | 0.662   | 0.431                      | 0.525   | 0.454                 | 0.495             |

\* $p < 0.05$  and \*\* $p < 0.01$ , sum of hydrolysis products: HPG+HPT+ PRN+NGN, DPPH: 2,2-diphenyl-1-picrylhydrazyl, FRAP: ferric-reducing antioxidant power, ORAC: oxygen radical absorbance capacity, ACE: angiotensin-I converting enzyme, PMFs: polymethoxyflavones.



Table S7. Theoretical and measured antioxidant activities in subcritical water extracts.

| X <sub>1</sub> | X <sub>2</sub> | DPPH radical scavenging activity (mg AAE/g) |                          | FRAP (mmol FSE/100 g) |                         | ORAC (mg TE/g) |                            |
|----------------|----------------|---------------------------------------------|--------------------------|-----------------------|-------------------------|----------------|----------------------------|
|                |                | Theoretical                                 | Measured                 | Theoretical           | Measured                | Theoretical    | Measured                   |
| 145            | 1.5            | 1.4                                         | 8.3 ± 0.1 <sup>f</sup>   | 11.9                  | 24.7 ± 1.1 <sup>f</sup> | 88.0           | 169.5 ± 5.2 <sup>d</sup>   |
| 150            | 1              | 1.2                                         | 8.2 ± 0.3 <sup>f</sup>   | 10.4                  | 24.9 ± 0.9 <sup>f</sup> | 76.5           | 122.8 ± 5.8 <sup>e</sup>   |
| 150            | 2              | 1.9                                         | 14.8 ± 0.5 <sup>c</sup>  | 16.0                  | 28.9 ± 0.7 <sup>e</sup> | 116.8          | 338.8 ± 16.6 <sup>b</sup>  |
| 160            | 0.75           | 1.3                                         | 9.5 ± 0.6 <sup>e</sup>   | 10.8                  | 25.5 ± 0.9 <sup>f</sup> | 80.4           | 281.3 ± 17.5 <sup>c</sup>  |
| 160            | 1.5            | 1.9                                         | 13.3 ± 0.7 <sup>d</sup>  | 16.3                  | 45.3 ± 1.3 <sup>c</sup> | 120.3          | 316.2 ± 26.3 <sup>bc</sup> |
| 160            | 2.25           | 2.3                                         | 18.6 ± 0.3 <sup>a</sup>  | 19.3                  | 48.8 ± 1.3 <sup>b</sup> | 141.6          | 397.4 ± 21.8 <sup>a</sup>  |
| 170            | 1              | 1.8                                         | 14.0 ± 0.0 <sup>cd</sup> | 14.4                  | 39.3 ± 1.1 <sup>d</sup> | 109.9          | 327.6 ± 5.0 <sup>b</sup>   |
| 170            | 2              | 2.2                                         | 17.2 ± 0.4 <sup>b</sup>  | 18.9                  | 44.4 ± 1.4 <sup>c</sup> | 139.6          | 423.4 ± 34.9 <sup>a</sup>  |
| 175            | 1.5            | 2.0                                         | 18.6 ± 0.4 <sup>a</sup>  | 16.5                  | 52.6 ± 1.8 <sup>a</sup> | 126.5          | 424.9 ± 32.5 <sup>a</sup>  |

X<sub>1</sub>: temperature (°C), X<sub>2</sub>: flow rate (mL/min), DPPH: 2,2-diphenyl-1-picrylhydrazyl, FRAP: ferric-reducing antioxidant power, ORAC: oxygen radical absorbance capacity. The same superscript letters in each column (<sup>a-f</sup>) indicate no significant differences ( $p < 0.05$ ). Data are expressed as the mean ± standard deviation of triplicate experiments.

**Table S8.** Xanthine oxidase inhibitory activities at different flavonoid concentrations.

| <b>Flavonoid</b>                  | <b>Concentration (mg/L)</b> | <b>Inhibitory activity (%)</b> |
|-----------------------------------|-----------------------------|--------------------------------|
| Hesperetin                        | 150                         | 40.1 ± 1.2                     |
|                                   | 200                         | 44.1 ± 1.2                     |
|                                   | 250                         | 18.1 ± 1.2                     |
|                                   | 300                         | 51.6 ± 2.6                     |
|                                   | 350                         | 56.1 ± 1.4                     |
| Narirutin                         | 600                         | 42.3 ± 1.3                     |
|                                   | 800                         | 45.4 ± 0.8                     |
|                                   | 1000                        | 48.2 ± 0.9                     |
|                                   | 1200                        | 51.3 ± 0.5                     |
|                                   | 1400                        | 54.4 ± 1.5                     |
| Prunin                            | 400                         | 42.9 ± 0.5                     |
|                                   | 600                         | 46.1 ± 0.7                     |
|                                   | 800                         | 48.8 ± 0.1                     |
|                                   | 1000                        | 52.6 ± 0.8                     |
|                                   | 1200                        | 55.0 ± 0.9                     |
| Naringenin                        | 120                         | 48.3 ± 1.1                     |
|                                   | 140                         | 52.3 ± 0.8                     |
|                                   | 160                         | 55.2 ± 1.8                     |
|                                   | 180                         | 59.1 ± 2.9                     |
|                                   | 200                         | 62.6 ± 2.0                     |
| Allopurinol<br>(positive control) | 80                          | 33.8 ± 1.6                     |
|                                   | 100                         | 42.7 ± 0.3                     |
|                                   | 120                         | 51.6 ± 2.2                     |
|                                   | 140                         | 61.7 ± 4.1                     |
|                                   | 160                         | 68.1 ± 2.8                     |

Data are expressed as the mean ± standard deviation of triplicate experiments.

**Table S9.** Angiotensin-I converting enzyme inhibitory activities at different flavonoid concentrations.

| Flavonoid                         | Concentration (mg/L) | Inhibitory activity (%) |
|-----------------------------------|----------------------|-------------------------|
| Hesperidin                        | 1000                 | 40.1 ± 1.2              |
|                                   | 1200                 | 46.2 ± 1.3              |
|                                   | 1400                 | 51.2 ± 1.7              |
|                                   | 1600                 | 55.6 ± 1.6              |
|                                   | 1800                 | 60.2 ± 3.4              |
| Hesperetin-7- <i>O</i> -glucoside | 60                   | 37.4 ± 1.9              |
|                                   | 80                   | 43.6 ± 0.7              |
|                                   | 100                  | 48.3 ± 1.0              |
|                                   | 120                  | 53.3 ± 1.5              |
|                                   | 140                  | 58.7 ± 0.3              |
| Hesperetin                        | 100                  | 27.9 ± 0.2              |
|                                   | 200                  | 36.3 ± 0.2              |
|                                   | 300                  | 46.4 ± 2.0              |
|                                   | 400                  | 54.4 ± 0.3              |
|                                   | 500                  | 60.7 ± 0.9              |
| Narirutin                         | 1200                 | 32.8 ± 0.9              |
|                                   | 1400                 | 36.6 ± 0.5              |
|                                   | 1600                 | 41.8 ± 0.9              |
|                                   | 1800                 | 47.2 ± 1.2              |
|                                   | 2000                 | 51.4 ± 1.1              |
| Prunin                            | 100                  | 35.7 ± 0.5              |
|                                   | 150                  | 42.2 ± 0.9              |
|                                   | 200                  | 47.4 ± 1.0              |
|                                   | 250                  | 52.8 ± 0.6              |
|                                   | 300                  | 59.7 ± 1.3              |
| Naringenin                        | 200                  | 33.2 ± 1.1              |
|                                   | 300                  | 39.5 ± 0.9              |
|                                   | 400                  | 46.4 ± 1.1              |
|                                   | 500                  | 52.8 ± 1.0              |
|                                   | 600                  | 59.0 ± 1.8              |
| Sinensetin                        | 100                  | 12.2 ± 1.4              |
|                                   | 200                  | 28.5 ± 0.8              |
|                                   | 300                  | 41.4 ± 1.3              |
|                                   | 400                  | 55.5 ± 0.9              |
|                                   | 500                  | 65.8 ± 2.2              |
| Nobiletin                         | 100                  | 24.4 ± 0.8              |
|                                   | 200                  | 35.9 ± 0.3              |
|                                   | 300                  | 45.5 ± 1.4              |
|                                   | 400                  | 59.7 ± 1.1              |
|                                   | 500                  | 71.3 ± 1.7              |
| Tangeretin                        | 100                  | 23.5 ± 1.1              |
|                                   | 200                  | 33.8 ± 1.4              |
|                                   | 300                  | 45.9 ± 1.6              |
|                                   | 400                  | 53.6 ± 0.5              |
|                                   | 500                  | 66.1 ± 1.9              |
| Captopril<br>(positive control)   | 2                    | 8.3 ± 2.7               |
|                                   | 4                    | 12.3 ± 2.1              |
|                                   | 6                    | 40.2 ± 2.7              |
|                                   | 8                    | 63.4 ± 2.5              |
|                                   | 10                   | 89.0 ± 2.8              |

Data are expressed as the mean ± standard deviation of triplicate experiments.

**Table S10.**  $\alpha$ -Glucosidase inhibitory activities at different flavonoid concentrations.

| Flavonoid                      | Concentration (mg/L) | Inhibitory activity (%) |
|--------------------------------|----------------------|-------------------------|
| Hesperetin-7-O-glucoside       | 1000                 | 41.1 $\pm$ 1.3          |
|                                | 1200                 | 45.0 $\pm$ 1.5          |
|                                | 1400                 | 50.5 $\pm$ 2.4          |
|                                | 1600                 | 54.7 $\pm$ 1.5          |
|                                | 1800                 | 59.2 $\pm$ 1.8          |
| Hesperetin                     | 50                   | 39.0 $\pm$ 2.0          |
|                                | 75                   | 42.7 $\pm$ 2.1          |
|                                | 100                  | 45.9 $\pm$ 1.5          |
|                                | 125                  | 49.0 $\pm$ 1.1          |
|                                | 150                  | 52.2 $\pm$ 0.7          |
| Narirutin                      | 400                  | 33.9 $\pm$ 2.5          |
|                                | 600                  | 39.5 $\pm$ 1.3          |
|                                | 800                  | 44.0 $\pm$ 0.4          |
|                                | 1000                 | 49.8 $\pm$ 1.7          |
|                                | 1200                 | 55.5 $\pm$ 1.1          |
| Prunin                         | 400                  | 41.6 $\pm$ 1.1          |
|                                | 500                  | 45.6 $\pm$ 1.3          |
|                                | 600                  | 49.5 $\pm$ 2.0          |
|                                | 700                  | 52.4 $\pm$ 0.9          |
|                                | 800                  | 56.7 $\pm$ 0.5          |
| Naringenin                     | 50                   | 46.3 $\pm$ 0.8          |
|                                | 75                   | 50.4 $\pm$ 0.7          |
|                                | 100                  | 54.9 $\pm$ 1.1          |
|                                | 125                  | 58.9 $\pm$ 1.4          |
|                                | 150                  | 63.6 $\pm$ 2.3          |
| Tangeretin                     | 1200                 | 41.3 $\pm$ 1.1          |
|                                | 1400                 | 44.7 $\pm$ 1.1          |
|                                | 1600                 | 47.2 $\pm$ 0.9          |
|                                | 1800                 | 50.7 $\pm$ 0.9          |
|                                | 2000                 | 53.4 $\pm$ 1.8          |
| Acarbose<br>(positive control) | 1000                 | 44.5 $\pm$ 1.7          |
|                                | 1200                 | 47.9 $\pm$ 1.2          |
|                                | 1400                 | 50.2 $\pm$ 0.8          |
|                                | 1600                 | 53.2 $\pm$ 1.1          |
|                                | 1800                 | 56.6 $\pm$ 1.2          |

Data are expressed as the mean  $\pm$  standard deviation of triplicate experiments.

**Table S11.** Pancreatic lipase inhibitory activities at different flavonoid concentrations.

| Flavonoid                         | Concentration (mg/L) | Inhibitory activity (%) |
|-----------------------------------|----------------------|-------------------------|
| Hesperidin                        | 200                  | 43.7 ± 1.6              |
|                                   | 400                  | 50.0 ± 0.8              |
|                                   | 600                  | 55.0 ± 0.4              |
|                                   | 800                  | 60.1 ± 0.4              |
|                                   | 1,000                | 64.8 ± 1.6              |
| Hesperetin-7- <i>O</i> -glucoside | 50                   | 46.7 ± 0.3              |
|                                   | 100                  | 51.4 ± 0.5              |
|                                   | 150                  | 56.2 ± 1.8              |
|                                   | 200                  | 61.5 ± 1.0              |
|                                   | 250                  | 65.7 ± 1.8              |
| Hesperetin                        | 50                   | 45.7 ± 1.0              |
|                                   | 100                  | 49.9 ± 0.4              |
|                                   | 150                  | 53.3 ± 0.6              |
|                                   | 200                  | 57.3 ± 0.3              |
|                                   | 250                  | 60.4 ± 0.9              |
| Sinensetin                        | 100                  | 40.3 ± 2.9              |
|                                   | 200                  | 46.0 ± 1.9              |
|                                   | 300                  | 50.3 ± 0.9              |
|                                   | 400                  | 54.4 ± 0.9              |
|                                   | 500                  | 58.2 ± 1.9              |
| Nobiletin                         | 100                  | 35.1 ± 1.6              |
|                                   | 200                  | 39.4 ± 0.9              |
|                                   | 300                  | 44.6 ± 1.5              |
|                                   | 400                  | 48.1 ± 1.1              |
|                                   | 500                  | 53.8 ± 1.4              |
| Tangeretin                        | 50                   | 37.9 ± 0.8              |
|                                   | 100                  | 43.8 ± 0.5              |
|                                   | 150                  | 51.0 ± 0.7              |
|                                   | 200                  | 55.9 ± 0.8              |
|                                   | 250                  | 62.1 ± 1.8              |
| Orlistat<br>(positive control)    | 20                   | 40.1 ± 4.1              |
|                                   | 40                   | 44.6 ± 2.5              |
|                                   | 60                   | 51.7 ± 1.2              |
|                                   | 80                   | 57.8 ± 1.6              |
|                                   | 100                  | 63.0 ± 2.7              |

Data are expressed as the mean ± standard deviation of triplicate experiments.
